# Supplementary material for: Martian magnetism with orbiting sub-millimeter sensor: simulated retrieval system
Source: Copernicus journal article supplement (doi:10.5194/gi-6-27-2017), 2017-01-27
Supplement: Supplementary file 1 [file gi-6-27-2017-supplement.pdf]

Supplement of Geosci. Instrum. Method. Data Syst., 6, 27–37, 2017  
<http://www.geosci-instrum-method-data-syst.net/6/27/2017/>  
doi:10.5194/gi-6-27-2017-supplement  
© Author(s) 2017. CC Attribution 3.0 License.

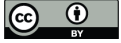

*Supplement of*

## **Martian magnetism with orbiting sub-millimeter sensor: simulated retrieval system**

**Richard Larsson et al.**

*Correspondence to:* Richard Larsson (ric.larsson@gmail.com)

The copyright of individual parts of the supplement might differ from the CC-BY 3.0 licence.

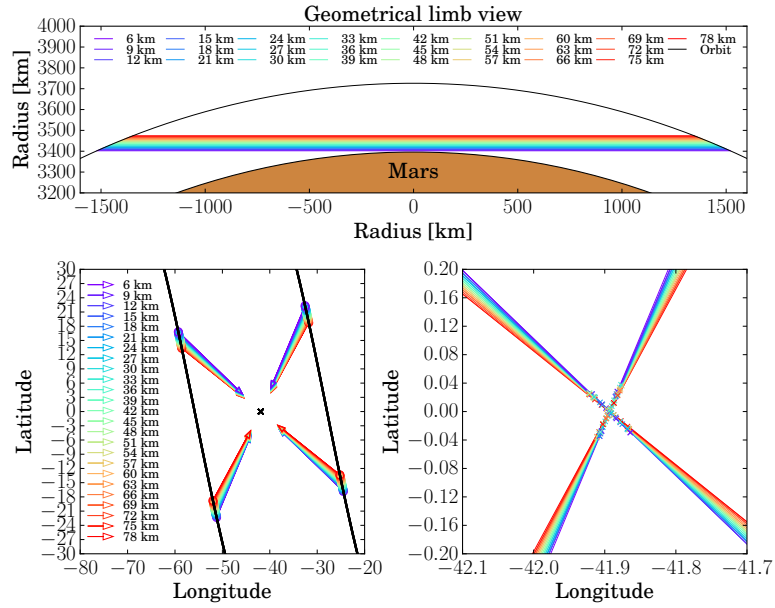

Figure 1: Detailed description of the observation geometry. Top panel shows the limb view geometry we use in the work and an analogical circular orbit at 330 km altitude. The legend shows tangent altitude of the observations. Note that we do not propose looking ahead and behind along the orbit but to look at an offset tangent profile occurring between two subsequent passes. Therefore, the distances from the analogical satellite orbit to the tangent point are not on scale except for at the intersections between the limb profiles and the analogical orbit. The angle that the satellite has to move to observe behind is also not on scale. The bottom two panels complements figure 1 in the main paper by showing the general observation direction from the orbit to the tangent points. These are on scale. The legend of the left panel shows the tangent altitudes and the colors are the same as in the right panel.
